# Supplementary material for: Identification of immune characteristic landscapes related to autophagy in ischemic stroke
Source: Front Cell Dev Biol. 2022 Nov 29;10:1026578. doi: 10.3389/fcell.2022.1026578 (PMC9745074; doi:10.3389/fcell.2022.1026578)
Supplement: Supplementary file 1 [file Table2.XLSX]

## Sheet: Sheet1
ID	Description	pvalue	p.adjust
GO:0071496	cellular response to external stimulus	8.84428e-12	1.0675e-08
GO:0031668	cellular response to extracellular stimulus	2.73408e-09	1.65002e-06
GO:0009411	response to UV	5.71942e-09	2.09887e-06
GO:0009314	response to radiation	6.95566e-09	2.09887e-06
GO:0009416	response to light stimulus	1.68576e-08	3.66774e-06
GO:0071214	cellular response to abiotic stimulus	2.1271e-08	3.66774e-06
GO:0104004	cellular response to environmental stimulus	2.1271e-08	3.66774e-06
GO:0031669	cellular response to nutrient levels	5.12154e-08	7.72712e-06
GO:0006979	response to oxidative stress	1.63336e-07	2.19051e-05
GO:0031667	response to nutrient levels	2.46866e-07	2.97967e-05
GO:0016236	macroautophagy	3.06435e-07	3.08497e-05
GO:0010212	response to ionizing radiation	3.06708e-07	3.08497e-05
GO:0062197	cellular response to chemical stress	7.24151e-07	6.46278e-05
GO:0007568	aging	7.49619e-07	6.46278e-05
GO:0070482	response to oxygen levels	8.58962e-07	6.91178e-05
GO:0071478	cellular response to radiation	9.52252e-07	7.09328e-05
GO:0043555	regulation of translation in response to stress	9.99054e-07	7.09328e-05
GO:0070997	neuron death	1.08171e-06	7.25349e-05
GO:0034644	cellular response to UV	1.83099e-06	0.000116316
GO:0016032	viral process	2.42985e-06	0.000142063
GO:1901216	positive regulation of neuron death	2.47169e-06	0.000142063
GO:0000045	autophagosome assembly	2.68192e-06	0.00014714
GO:1905037	autophagosome organization	3.14185e-06	0.000164119
GO:0045936	negative regulation of phosphate metabolic process	3.45171e-06	0.000164119
GO:0010563	negative regulation of phosphorus metabolic process	3.4971e-06	0.000164119
GO:2000637	positive regulation of gene silencing by miRNA	3.53529e-06	0.000164119
GO:0060148	positive regulation of posttranscriptional gene silencing	3.91156e-06	0.000174861
GO:0009410	response to xenobiotic stimulus	4.5125e-06	0.000190153
GO:0034976	response to endoplasmic reticulum stress	4.56872e-06	0.000190153
GO:0010165	response to X-ray	4.74174e-06	0.000190776
GO:0071482	cellular response to light stimulus	6.36909e-06	0.000247983
GO:0034599	cellular response to oxidative stress	8.10465e-06	0.000296434
GO:0097193	intrinsic apoptotic signaling pathway	8.10465e-06	0.000296434
GO:2000045	regulation of G1/S transition of mitotic cell cycle	1.1251e-05	0.000399412
GO:0010506	regulation of autophagy	1.28987e-05	0.000411514
GO:0019058	viral life cycle	1.28987e-05	0.000411514
GO:0006984	ER-nucleus signaling pathway	1.30832e-05	0.000411514
GO:0051384	response to glucocorticoid	1.32485e-05	0.000411514
GO:1901214	regulation of neuron death	1.32967e-05	0.000411514
GO:0036293	response to decreased oxygen levels	1.39116e-05	0.000419782
GO:0060964	regulation of gene silencing by miRNA	1.58486e-05	0.000466569
GO:0009267	cellular response to starvation	1.63043e-05	0.000468554
GO:0060147	regulation of posttranscriptional gene silencing	1.89743e-05	0.000532603
GO:0060966	regulation of gene silencing by RNA	2.00998e-05	0.000551375
GO:0031960	response to corticosteroid	2.13164e-05	0.000571754
GO:1902806	regulation of cell cycle G1/S phase transition	2.18223e-05	0.000572598
GO:0010332	response to gamma radiation	2.37384e-05	0.000609623
GO:0009266	response to temperature stimulus	2.738e-05	0.000688493
GO:0007033	vacuole organization	2.86055e-05	0.000704629
GO:0070059	intrinsic apoptotic signaling pathway in response to endoplasmic reticulum stress	3.38548e-05	0.000817255
GO:0042594	response to starvation	4.07136e-05	0.000963556
GO:0061912	selective autophagy	4.25886e-05	0.000988547
GO:0001558	regulation of cell growth	4.64474e-05	0.00105777
GO:0071479	cellular response to ionizing radiation	5.05523e-05	0.00112994
GO:0036490	regulation of translation in response to endoplasmic reticulum stress	5.33697e-05	0.00117122
GO:0030968	endoplasmic reticulum unfolded protein response	5.48759e-05	0.00118277
GO:0000082	G1/S transition of mitotic cell cycle	5.62137e-05	0.00119035
GO:0009612	response to mechanical stimulus	5.8285e-05	0.00119564
GO:0031100	animal organ regeneration	5.94353e-05	0.00119564
GO:2000379	positive regulation of reactive oxygen species metabolic process	5.94353e-05	0.00119564
GO:1903800	positive regulation of production of miRNAs involved in gene silencing by miRNA	6.40048e-05	0.00126218
GO:0000302	response to reactive oxygen species	6.48345e-05	0.00126218
GO:0006446	regulation of translational initiation	6.67291e-05	0.00127844
GO:0000422	autophagy of mitochondrion	7.19031e-05	0.00131496
GO:0060968	regulation of gene silencing	7.19031e-05	0.00131496
GO:0061726	mitochondrion disassembly	7.19031e-05	0.00131496
GO:0006970	response to osmotic stress	8.01459e-05	0.00144382
GO:0010507	negative regulation of autophagy	8.30248e-05	0.00147369
GO:0043558	regulation of translational initiation in response to stress	8.81423e-05	0.00153707
GO:0044843	cell cycle G1/S phase transition	8.91426e-05	0.00153707
GO:0016049	cell growth	9.55101e-05	0.00162367
GO:0018410	C-terminal protein amino acid modification	0.000101641	0.0017039
GO:0090398	cellular senescence	0.000108522	0.00179432
GO:0000079	regulation of cyclin-dependent protein serine/threonine kinase activity	0.000112027	0.00181976
GO:0006978	DNA damage response, signal transduction by p53 class mediator resulting in transcription of p21 class mediator	0.000116091	0.00181976
GO:0010225	response to UV-C	0.000116091	0.00181976
GO:0070242	thymocyte apoptotic process	0.000116091	0.00181976
GO:0034620	cellular response to unfolded protein	0.000119259	0.00184546
GO:1904029	regulation of cyclin-dependent protein kinase activity	0.000126789	0.00191215
GO:0008630	intrinsic apoptotic signaling pathway in response to DNA damage	0.000130667	0.00191215
GO:0034349	glial cell apoptotic process	0.00013149	0.00191215
GO:0042772	DNA damage response, signal transduction resulting in transcription	0.00013149	0.00191215
GO:0090399	replicative senescence	0.00013149	0.00191215
GO:0036499	PERK-mediated unfolded protein response	0.000147837	0.00212428
GO:0071887	leukocyte apoptotic process	0.000159997	0.00227196
GO:0006977	DNA damage response, signal transduction by p53 class mediator resulting in cell cycle arrest	0.00016513	0.00231757
GO:1903008	organelle disassembly	0.000198407	0.00275262
GO:0048511	rhythmic process	0.000201847	0.00276852
GO:1901990	regulation of mitotic cell cycle phase transition	0.000204452	0.00277274
GO:0035967	cellular response to topologically incorrect protein	0.000208862	0.00280107
GO:0006413	translational initiation	0.000219669	0.00285912
GO:0044346	fibroblast apoptotic process	0.000222665	0.00285912
GO:0051412	response to corticosterone	0.000222665	0.00285912
GO:0140467	integrated stress response signaling	0.000222665	0.00285912
GO:0001666	response to hypoxia	0.000226178	0.00287365
GO:0009895	negative regulation of catabolic process	0.000264975	0.00333151
GO:1903798	regulation of production of miRNAs involved in gene silencing by miRNA	0.000288651	0.00359177
GO:0007569	cell aging	0.000305585	0.00376369
GO:0042113	B cell activation	0.000311899	0.00377207
GO:0070920	regulation of production of small RNA involved in gene silencing by RNA	0.000312516	0.00377207
GO:0048545	response to steroid hormone	0.000330022	0.00394393
GO:0006986	response to unfolded protein	0.000340836	0.00399895
GO:0001933	negative regulation of protein phosphorylation	0.000341253	0.00399895
GO:0000423	mitophagy	0.000363041	0.00417324
GO:0090200	positive regulation of release of cytochrome c from mitochondria	0.000363041	0.00417324
GO:0033135	regulation of peptidyl-serine phosphorylation	0.000394448	0.00444952
GO:0046718	viral entry into host cell	0.000394448	0.00444952
GO:0031571	mitotic G1 DNA damage checkpoint signaling	0.00041728	0.0046207
GO:1900101	regulation of endoplasmic reticulum unfolded protein response	0.00041728	0.0046207
GO:0001782	B cell homeostasis	0.000445788	0.00480416
GO:0044819	mitotic G1/S transition checkpoint signaling	0.000445788	0.00480416
GO:0071480	cellular response to gamma radiation	0.000445788	0.00480416
GO:0044409	entry into host	0.000453219	0.00484102
GO:0010038	response to metal ion	0.00047398	0.00498774
GO:0045736	negative regulation of cyclin-dependent protein serine/threonine kinase activity	0.00047522	0.00498774
GO:1904030	negative regulation of cyclin-dependent protein kinase activity	0.000505573	0.00515109
GO:1904031	positive regulation of cyclin-dependent protein kinase activity	0.000505573	0.00515109
GO:0002262	myeloid cell homeostasis	0.000507854	0.00515109
GO:2000377	regulation of reactive oxygen species metabolic process	0.000507854	0.00515109
GO:0035966	response to topologically incorrect protein	0.000526962	0.00528411
GO:0042326	negative regulation of phosphorylation	0.000534102	0.00528411
GO:0045786	negative regulation of cell cycle	0.000534102	0.00528411
GO:0034250	positive regulation of cellular amide metabolic process	0.000556482	0.00545772
GO:1901987	regulation of cell cycle phase transition	0.000560693	0.00545772
GO:0039694	viral RNA genome replication	0.000569038	0.00549464
GO:0030307	positive regulation of cell growth	0.000597465	0.00572277
GO:0051385	response to mineralocorticoid	0.000602147	0.00572277
GO:0043687	post-translational protein modification	0.00063617	0.00599889
GO:2000279	negative regulation of DNA biosynthetic process	0.000671107	0.00627928
GO:0048771	tissue remodeling	0.000696633	0.0064186
GO:0052126	movement in host environment	0.000696633	0.0064186
GO:0071276	cellular response to cadmium ion	0.000743714	0.00680048
GO:0042060	wound healing	0.000753798	0.00680968
GO:0048660	regulation of smooth muscle cell proliferation	0.000756004	0.00680968
GO:0044772	mitotic cell cycle phase transition	0.000767251	0.00685979
GO:0043254	regulation of protein-containing complex assembly	0.000794667	0.00705267
GO:0048659	smooth muscle cell proliferation	0.000805759	0.00709891
GO:1902895	positive regulation of pri-miRNA transcription by RNA polymerase II	0.000819954	0.00717162
GO:0042771	intrinsic apoptotic signaling pathway in response to DNA damage by p53 class mediator	0.000859431	0.00746283
GO:1901654	response to ketone	0.000939163	0.00809693
GO:0071248	cellular response to metal ion	0.000981753	0.00829941
GO:0034198	cellular response to amino acid starvation	0.000983277	0.00829941
GO:1900087	positive regulation of G1/S transition of mitotic cell cycle	0.000983277	0.00829941
GO:0031099	regeneration	0.000996218	0.00835025
GO:0007346	regulation of mitotic cell cycle	0.00101468	0.00842731
GO:0043618	regulation of transcription from RNA polymerase II promoter in response to stress	0.00102636	0.00842731
GO:0046677	response to antibiotic	0.00102636	0.00842731
GO:0090199	regulation of release of cytochrome c from mitochondria	0.00107033	0.0086724
GO:0051701	biological process involved in interaction with host	0.00107058	0.0086724
GO:0008038	neuron recognition	0.00111521	0.00891427
GO:1990928	response to amino acid starvation	0.00111521	0.00891427
GO:0070231	T cell apoptotic process	0.00116097	0.00921903
GO:0007623	circadian rhythm	0.00118047	0.00931259
GO:0035196	production of miRNAs involved in gene silencing by miRNA	0.00125517	0.00983763
GO:0043620	regulation of DNA-templated transcription in response to stress	0.00130361	0.0100863
GO:2000772	regulation of cellular senescence	0.00130361	0.0100863
GO:0031050	dsRNA processing	0.00135293	0.0102703
GO:0070918	production of small RNA involved in gene silencing by RNA	0.00135293	0.0102703
GO:1902893	regulation of pri-miRNA transcription by RNA polymerase II	0.00135293	0.0102703
GO:0061614	pri-miRNA transcription by RNA polymerase II	0.00140313	0.0105849
GO:0043470	regulation of carbohydrate catabolic process	0.00145422	0.0108618
GO:0071241	cellular response to inorganic substance	0.00145784	0.0108618
GO:0043525	positive regulation of neuron apoptotic process	0.00155904	0.0114742
GO:1902808	positive regulation of cell cycle G1/S phase transition	0.00155904	0.0114742
GO:0001836	release of cytochrome c from mitochondria	0.00161277	0.0117977
GO:0045930	negative regulation of mitotic cell cycle	0.00163044	0.0118551
GO:0031334	positive regulation of protein-containing complex assembly	0.00167046	0.0120734
GO:0072593	reactive oxygen species metabolic process	0.0017111	0.0122934
GO:0090342	regulation of cell aging	0.00172286	0.0123047
GO:0002260	lymphocyte homeostasis	0.00177921	0.0126324
GO:0046902	regulation of mitochondrial membrane permeability	0.00183643	0.0129624
GO:0030888	regulation of B cell proliferation	0.00189453	0.0132676
GO:0033002	muscle cell proliferation	0.00190165	0.0132676
GO:0097305	response to alcohol	0.00201303	0.0138862
GO:0014015	positive regulation of gliogenesis	0.00201332	0.0138862
GO:0007611	learning or memory	0.0020587	0.0141185
GO:0042698	ovulation cycle	0.00213558	0.0144811
GO:0046686	response to cadmium ion	0.00213558	0.0144811
GO:0045927	positive regulation of growth	0.00215198	0.0145108
GO:0034605	cellular response to heat	0.002198	0.0147388
GO:0009636	response to toxic substance	0.00222364	0.0147469
GO:0031330	negative regulation of cellular catabolic process	0.00222364	0.0147469
GO:0051348	negative regulation of transferase activity	0.00237141	0.0155958
GO:0030330	DNA damage response, signal transduction by p53 class mediator	0.00239041	0.0155958
GO:0070227	lymphocyte apoptotic process	0.00239041	0.0155958
GO:0048872	homeostasis of number of cells	0.00247325	0.0160495
GO:0010822	positive regulation of mitochondrion organization	0.00252297	0.0162846
GO:0072332	intrinsic apoptotic signaling pathway by p53 class mediator	0.00265893	0.0170709
GO:0090559	regulation of membrane permeability	0.00279829	0.0178706
GO:0046651	lymphocyte proliferation	0.00290772	0.0184717
GO:0048145	regulation of fibroblast proliferation	0.00294104	0.0185587
GO:0044403	biological process involved in symbiotic interaction	0.00296513	0.0185587
GO:0032943	mononuclear cell proliferation	0.0029941	0.0185587
GO:0044773	mitotic DNA damage checkpoint signaling	0.00301367	0.0185587
GO:0048144	fibroblast proliferation	0.00301367	0.0185587
GO:0071260	cellular response to mechanical stimulus	0.00301367	0.0185587
GO:1905897	regulation of response to endoplasmic reticulum stress	0.00308715	0.0189147
GO:0050890	cognition	0.00314157	0.0191509
GO:0031647	regulation of protein stability	0.00320179	0.0194199
GO:2000134	negative regulation of G1/S transition of mitotic cell cycle	0.00323662	0.019533
GO:0044774	mitotic DNA integrity checkpoint signaling	0.00331261	0.0197937
GO:0097194	execution phase of apoptosis	0.00331261	0.0197937
GO:0034103	regulation of tissue remodeling	0.00338944	0.020153
GO:0001776	leukocyte homeostasis	0.0034671	0.0204136
GO:1903578	regulation of ATP metabolic process	0.0034671	0.0204136
GO:0018105	peptidyl-serine phosphorylation	0.00374267	0.0219291
GO:0070661	leukocyte proliferation	0.00384358	0.0223371
GO:0006497	protein lipidation	0.00386782	0.0223371
GO:0035249	synaptic transmission, glutamatergic	0.00386782	0.0223371
GO:1901992	positive regulation of mitotic cell cycle phase transition	0.00395044	0.022598
GO:1902807	negative regulation of cell cycle G1/S phase transition	0.00395044	0.022598
GO:0042158	lipoprotein biosynthetic process	0.00420323	0.0239307
GO:0042100	B cell proliferation	0.00446338	0.0252925
GO:0018209	peptidyl-serine modification	0.00455913	0.0257143
GO:0014013	regulation of gliogenesis	0.00482161	0.026943
GO:0045639	positive regulation of myeloid cell differentiation	0.00482161	0.026943
GO:0048661	positive regulation of smooth muscle cell proliferation	0.00491318	0.0273282
GO:2000278	regulation of DNA biosynthetic process	0.00509875	0.0282302
GO:0006275	regulation of DNA replication	0.00519273	0.0284892
GO:0008637	apoptotic mitochondrial changes	0.00519273	0.0284892
GO:0033138	positive regulation of peptidyl-serine phosphorylation	0.00528752	0.028878
GO:0051052	regulation of DNA metabolic process	0.00539259	0.0291877
GO:0071900	regulation of protein serine/threonine kinase activity	0.00539259	0.0291877
GO:0009408	response to heat	0.00547948	0.0295256
GO:0051098	regulation of binding	0.00556111	0.0298323
GO:0050767	regulation of neurogenesis	0.00560373	0.0299279
GO:0046660	female sex differentiation	0.00587295	0.0312275
GO:0000077	DNA damage checkpoint signaling	0.00597329	0.0313468
GO:0043279	response to alkaloid	0.00597329	0.0313468
GO:1901989	positive regulation of cell cycle phase transition	0.00597329	0.0313468
GO:0007006	mitochondrial membrane organization	0.00607442	0.0317395
GO:0030099	myeloid cell differentiation	0.00635884	0.0330824
GO:0030218	erythrocyte differentiation	0.00648679	0.0334596
GO:0071901	negative regulation of protein serine/threonine kinase activity	0.00648679	0.0334596
GO:0045931	positive regulation of mitotic cell cycle	0.00659183	0.0338568
GO:0031570	DNA integrity checkpoint signaling	0.00680426	0.0347998
GO:0051053	negative regulation of DNA metabolic process	0.00701979	0.0357506
GO:0048565	digestive tract development	0.00723841	0.0367091
GO:0007093	mitotic cell cycle checkpoint signaling	0.0074601	0.0375181
GO:0034101	erythrocyte homeostasis	0.0074601	0.0375181
GO:0043467	regulation of generation of precursor metabolites and energy	0.0075721	0.0379234
GO:0019079	viral genome replication	0.00768487	0.0383291
GO:0042157	lipoprotein metabolic process	0.00814354	0.0404496
GO:0045727	positive regulation of translation	0.00826011	0.0408605
GO:0055123	digestive system development	0.00837743	0.0412717
GO:0072594	establishment of protein localization to organelle	0.00842301	0.0413275
GO:0048608	reproductive structure development	0.00853269	0.0416962
GO:0032103	positive regulation of response to external stimulus	0.00869879	0.0421664
GO:0061458	reproductive system development	0.00869879	0.0421664
GO:0016241	regulation of macroautophagy	0.00885425	0.0424091
GO:0030183	B cell differentiation	0.00885425	0.0424091
GO:0032355	response to estradiol	0.00885425	0.0424091
GO:0010821	regulation of mitochondrion organization	0.00921973	0.0439851
GO:0042542	response to hydrogen peroxide	0.00946711	0.0449874
GO:0022411	cellular component disassembly	0.00961715	0.0453434
GO:0051960	regulation of nervous system development	0.00961715	0.0453434
GO:0051592	response to calcium ion	0.00984373	0.0460215
GO:0032025	response to cobalt ion	0.0101041	0.0460215
GO:0034356	NAD biosynthesis via nicotinamide riboside salvage pathway	0.0101041	0.0460215
GO:0045898	regulation of RNA polymerase II transcription preinitiation complex assembly	0.0101041	0.0460215
GO:0051974	negative regulation of telomerase activity	0.0101041	0.0460215
GO:0060068	vagina development	0.0101041	0.0460215
GO:1901524	regulation of mitophagy	0.0101041	0.0460215
GO:1902513	regulation of organelle transport along microtubule	0.0101041	0.0460215
GO:2000674	regulation of type B pancreatic cell apoptotic process	0.0101041	0.0460215
GO:0016052	carbohydrate catabolic process	0.0104862	0.0475819
GO:0006606	protein import into nucleus	0.0106168	0.0478154
GO:0034614	cellular response to reactive oxygen species	0.0106168	0.0478154
GO:0010248	establishment or maintenance of transmembrane electrochemical gradient	0.0111092	0.0481201
GO:0043619	regulation of transcription from RNA polymerase II promoter in response to oxidative stress	0.0111092	0.0481201
GO:0048102	autophagic cell death	0.0111092	0.0481201
GO:0070243	regulation of thymocyte apoptotic process	0.0111092	0.0481201
GO:0090160	Golgi to lysosome transport	0.0111092	0.0481201
GO:0090649	response to oxygen-glucose deprivation	0.0111092	0.0481201
GO:0097050	type B pancreatic cell apoptotic process	0.0111092	0.0481201
GO:0098792	xenophagy	0.0111092	0.0481201
GO:1903897	regulation of PERK-mediated unfolded protein response	0.0111092	0.0481201
GO:1990440	positive regulation of transcription from RNA polymerase II promoter in response to endoplasmic reticulum stress	0.0111092	0.0481201
GO:0051170	import into nucleus	0.0111468	0.0481201
GO:0006417	regulation of translation	0.0111629	0.0481201
GO:0036294	cellular response to decreased oxygen levels	0.0114162	0.0490366
