# Supplementary material for: Identification of immune characteristic landscapes related to autophagy in ischemic stroke
Source: Front Cell Dev Biol. 2022 Nov 29;10:1026578. doi: 10.3389/fcell.2022.1026578 (PMC9745074; doi:10.3389/fcell.2022.1026578)
Supplement: Supplementary file 2 [file Table3.XLSX]

## Sheet: Sheet1
The detailed information of patients and subtypes of IS
sample	subtype	age-at-examination:ch1	age-at-onset:ch1	gender:ch1	ever smoker	ever drinker	Hypertension	hypercholesterolemia	diabetes
GSM554034	C1	71	65	female	NA	NA	NA	NA	NA
GSM554035	C1	65	65	female	NA	NA	Yes	NA	NA
GSM554036	C1	73	70	female	NA	NA	NA	NA	NA
GSM554037	C1	70	69	female	NA	NA	Yes	Yes	NA
GSM554038	C1	65	65	female	NA	NA	Yes	Yes	NA
GSM554039	C1	53	45	female	Yes	Yes	Yes	Yes	NA
GSM554040	C1	54	49	female	NA	Yes	Yes	Yes	Yes
GSM554041	C1	47	43	female	NA	NA	NA	Yes	NA
GSM554042	C1	54	50	female	NA	NA	Yes	NA	NA
GSM554043	C1	49	48	female	Yes	Yes	NA	Yes	Yes
GSM554044	C2	69	65	male	NA	Yes	Yes	Yes	Yes
GSM554045	C2	74	72	male	NA	Yes	Yes	NA	NA
GSM554046	C2	74	73	male	NA	Yes	Yes	Yes	NA
GSM554047	C2	68	66	male	NA	Yes	NA	NA	NA
GSM554048	C1	71	65	male	Yes	Yes	Yes	NA	NA
GSM554049	C2	54	53	male	NA	Yes	NA	Yes	Yes
GSM554050	C2	52	48	male	Yes	Yes	NA	Yes	NA
GSM554051	C2	46	45	male	NA	Yes	Yes	NA	NA
GSM554052	C2	49	47	male	Yes	Yes	NA	NA	NA
GSM554053	C1	46	45	male	NA	Yes	Yes	NA	NA

## Sheet: Sheet2
geo_accession	subtype	age.at.examination.ch1	age.at.onset.ch1	gender.ch1	ever.smoker	ever.drinker	Hypertension	hypercholesterolemia	diabetes
GSM554034	C1	71	>50	female	No	No	No	No	No
GSM554035	C1	65	>50	female	No	No	Yes	No	No
GSM554036	C1	73	>50	female	No	No	No	No	No
GSM554037	C1	70	>50	female	No	No	Yes	Yes	No
GSM554038	C1	65	>50	female	No	No	Yes	Yes	No
GSM554039	C1	53	<=50	female	Yes	Yes	Yes	Yes	No
GSM554040	C1	54	<=50	female	No	Yes	Yes	Yes	Yes
GSM554041	C1	47	<=50	female	No	No	No	Yes	No
GSM554042	C1	54	<=50	female	No	No	Yes	No	No
GSM554043	C1	49	<=50	female	Yes	Yes	No	Yes	Yes
GSM554044	C2	69	>50	male	No	Yes	Yes	Yes	Yes
GSM554045	C2	74	>50	male	No	Yes	Yes	No	No
GSM554046	C2	74	>50	male	No	Yes	Yes	Yes	No
GSM554047	C2	68	>50	male	No	Yes	No	No	No
GSM554048	C1	71	>50	male	Yes	Yes	Yes	No	No
GSM554049	C2	54	>50	male	No	Yes	No	Yes	Yes
GSM554050	C2	52	<=50	male	Yes	Yes	No	Yes	No
GSM554051	C2	46	<=50	male	No	Yes	Yes	No	No
GSM554052	C2	49	<=50	male	Yes	Yes	No	No	No
GSM554053	C1	46	<=50	male	No	Yes	Yes	No	No
