# Supplementary material for: Identification of immune characteristic landscapes related to autophagy in ischemic stroke
Source: Front Cell Dev Biol. 2022 Nov 29;10:1026578. doi: 10.3389/fcell.2022.1026578 (PMC9745074; doi:10.3389/fcell.2022.1026578)
Supplement: Supplementary file 8 [file Table4.XLSX]

## Sheet: Sheet1
Table S1. The results of GO-BP enrichment analysis of autophagy phenotype-related genes
ID	Description	pvalue	p.adjust
GO:0030098	lymphocyte differentiation	2.35563e-11	1.47651e-07
GO:0001819	positive regulation of cytokine production	4.89524e-10	1.53417e-06
GO:1903131	mononuclear cell differentiation	1.89473e-09	3.95872e-06
GO:0010498	proteasomal protein catabolic process	1.12722e-08	1.40589e-05
GO:0042110	T cell activation	1.28305e-08	1.40589e-05
GO:0030217	T cell differentiation	1.48679e-08	1.40589e-05
GO:0043161	proteasome-mediated ubiquitin-dependent protein catabolic process	1.57008e-08	1.40589e-05
GO:0071216	cellular response to biotic stimulus	3.04674e-08	2.38712e-05
GO:0002221	pattern recognition receptor signaling pathway	6.15503e-08	4.28664e-05
GO:0042176	regulation of protein catabolic process	7.30271e-08	4.43077e-05
GO:0019221	cytokine-mediated signaling pathway	7.77576e-08	4.43077e-05
GO:0032943	mononuclear cell proliferation	8.70508e-08	4.43567e-05
GO:1903362	regulation of cellular protein catabolic process	9.59425e-08	4.43567e-05
GO:0046651	lymphocyte proliferation	9.90737e-08	4.43567e-05
GO:0070661	leukocyte proliferation	1.06857e-07	4.46518e-05
GO:0006260	DNA replication	1.26769e-07	4.78002e-05
GO:1903320	regulation of protein modification by small protein conjugation or removal	1.29643e-07	4.78002e-05
GO:0016236	macroautophagy	1.74513e-07	6.07693e-05
GO:0048872	homeostasis of number of cells	3.15098e-07	0.000103949
GO:0097193	intrinsic apoptotic signaling pathway	3.9249e-07	0.000122587
GO:0009896	positive regulation of catabolic process	4.2922e-07	0.000122587
GO:0035966	response to topologically incorrect protein	4.39005e-07	0.000122587
GO:0072594	establishment of protein localization to organelle	4.49824e-07	0.000122587
GO:0070423	nucleotide-binding oligomerization domain containing signaling pathway	5.73994e-07	0.000149908
GO:0031396	regulation of protein ubiquitination	6.43674e-07	0.000161044
GO:0071219	cellular response to molecule of bacterial origin	6.68019e-07	0.000161044
GO:0007599	hemostasis	8.19632e-07	0.000190276
GO:0030183	B cell differentiation	8.5856e-07	0.000192195
GO:0031331	positive regulation of cellular catabolic process	9.18478e-07	0.000198518
GO:0051092	positive regulation of NF-kappaB transcription factor activity	1.02584e-06	0.000214333
GO:0051090	regulation of DNA-binding transcription factor activity	1.09426e-06	0.000217797
GO:0071222	cellular response to lipopolysaccharide	1.11192e-06	0.000217797
GO:0046632	alpha-beta T cell differentiation	1.22977e-06	0.000233582
GO:0035872	nucleotide-binding domain, leucine rich repeat containing receptor signaling pathway	1.33141e-06	0.000245449
GO:1903050	regulation of proteolysis involved in cellular protein catabolic process	1.39324e-06	0.000249509
GO:0000209	protein polyubiquitination	1.49143e-06	0.000254216
GO:0035967	cellular response to topologically incorrect protein	1.50064e-06	0.000254216
GO:0001776	leukocyte homeostasis	1.70491e-06	0.00028122
GO:0071496	cellular response to external stimulus	1.93072e-06	0.000310301
GO:0002753	cytoplasmic pattern recognition receptor signaling pathway	2.38675e-06	0.00036489
GO:0050863	regulation of T cell activation	2.3868e-06	0.00036489
GO:0007596	blood coagulation	2.67302e-06	0.000398916
GO:2000058	regulation of ubiquitin-dependent protein catabolic process	3.375e-06	0.000482641
GO:0050817	coagulation	3.44959e-06	0.000482641
GO:0032496	response to lipopolysaccharide	3.46503e-06	0.000482641
GO:0008380	RNA splicing	4.01226e-06	0.000546715
GO:0002285	lymphocyte activation involved in immune response	4.42912e-06	0.000590675
GO:0045732	positive regulation of protein catabolic process	4.65042e-06	0.000607267
GO:0006606	protein import into nucleus	4.88273e-06	0.000612099
GO:1903364	positive regulation of cellular protein catabolic process	4.88273e-06	0.000612099
GO:0002720	positive regulation of cytokine production involved in immune response	5.312e-06	0.000644039
GO:0051170	import into nucleus	5.41632e-06	0.000644039
GO:0017038	protein import	5.44576e-06	0.000644039
GO:0046631	alpha-beta T cell activation	6.1308e-06	0.000700025
GO:0000377	RNA splicing, via transesterification reactions with bulged adenosine as nucleophile	6.31006e-06	0.000700025
GO:0000398	mRNA splicing, via spliceosome	6.31006e-06	0.000700025
GO:0000375	RNA splicing, via transesterification reactions	6.44394e-06	0.000700025
GO:1902946	protein localization to early endosome	6.58837e-06	0.000700025
GO:0002237	response to molecule of bacterial origin	6.58925e-06	0.000700025
GO:0007159	leukocyte cell-cell adhesion	6.755e-06	0.000705672
GO:0002366	leukocyte activation involved in immune response	7.33217e-06	0.000753411
GO:0002263	cell activation involved in immune response	7.56469e-06	0.000764766
GO:0002819	regulation of adaptive immune response	9.06476e-06	0.000901872
GO:0061136	regulation of proteasomal protein catabolic process	9.73033e-06	0.000952964
GO:0030168	platelet activation	9.99403e-06	0.000963732
GO:0007249	I-kappaB kinase/NF-kappaB signaling	1.03874e-05	0.000986487
GO:0071900	regulation of protein serine/threonine kinase activity	1.11736e-05	0.00104531
GO:0051648	vesicle localization	1.17264e-05	0.0010809
GO:0010506	regulation of autophagy	1.26891e-05	0.00115043
GO:0036010	protein localization to endosome	1.28478e-05	0.00115043
GO:0006275	regulation of DNA replication	1.35157e-05	0.00118886
GO:0062197	cellular response to chemical stress	1.37022e-05	0.00118886
GO:0022407	regulation of cell-cell adhesion	1.39835e-05	0.00118886
GO:0051091	positive regulation of DNA-binding transcription factor activity	1.40356e-05	0.00118886
GO:0051656	establishment of organelle localization	1.74741e-05	0.00146037
GO:0042770	signal transduction in response to DNA damage	1.85621e-05	0.00153089
GO:0016032	viral process	2.00932e-05	0.00163564
GO:1903037	regulation of leukocyte cell-cell adhesion	2.04979e-05	0.00164719
GO:0035710	CD4-positive, alpha-beta T cell activation	2.20205e-05	0.00172701
GO:0045862	positive regulation of proteolysis	2.20423e-05	0.00172701
GO:0050670	regulation of lymphocyte proliferation	2.25881e-05	0.00173399
GO:0002312	B cell activation involved in immune response	2.27921e-05	0.00173399
GO:0006986	response to unfolded protein	2.29613e-05	0.00173399
GO:0042098	T cell proliferation	2.34301e-05	0.00173687
GO:0031570	DNA integrity checkpoint signaling	2.35537e-05	0.00173687
GO:0034620	cellular response to unfolded protein	2.73457e-05	0.00199306
GO:1905668	positive regulation of protein localization to endosome	2.93927e-05	0.00211763
GO:0030522	intracellular receptor signaling pathway	3.07255e-05	0.0021382
GO:0043367	CD4-positive, alpha-beta T cell differentiation	3.08525e-05	0.0021382
GO:0006903	vesicle targeting	3.10336e-05	0.0021382
GO:0042149	cellular response to glucose starvation	3.10427e-05	0.0021382
GO:0032944	regulation of mononuclear cell proliferation	3.16017e-05	0.00215304
GO:0002224	toll-like receptor signaling pathway	3.37478e-05	0.00227453
GO:0006913	nucleocytoplasmic transport	3.62253e-05	0.0023901
GO:0051169	nuclear transport	3.62253e-05	0.0023901
GO:0001516	prostaglandin biosynthetic process	3.78344e-05	0.00240825
GO:0001782	B cell homeostasis	3.78344e-05	0.00240825
GO:0046457	prostanoid biosynthetic process	3.78344e-05	0.00240825
GO:0051650	establishment of vesicle localization	3.80371e-05	0.00240825
GO:0050900	leukocyte migration	4.12411e-05	0.00258499
GO:0048536	spleen development	4.2102e-05	0.00261282
GO:0000077	DNA damage checkpoint signaling	4.30174e-05	0.00262394
GO:0006605	protein targeting	4.31184e-05	0.00262394
GO:0034976	response to endoplasmic reticulum stress	4.5241e-05	0.00272664
GO:0002367	cytokine production involved in immune response	4.68428e-05	0.00279629
GO:0002821	positive regulation of adaptive immune response	4.8536e-05	0.00286477
GO:0070663	regulation of leukocyte proliferation	4.90786e-05	0.00286477
GO:0018105	peptidyl-serine phosphorylation	4.93611e-05	0.00286477
GO:0043122	regulation of I-kappaB kinase/NF-kappaB signaling	5.02934e-05	0.00287607
GO:0071214	cellular response to abiotic stimulus	5.09323e-05	0.00287607
GO:0104004	cellular response to environmental stimulus	5.09323e-05	0.00287607
GO:0002764	immune response-regulating signaling pathway	5.42589e-05	0.00303656
GO:0032434	regulation of proteasomal ubiquitin-dependent protein catabolic process	5.72691e-05	0.00317666
GO:0042100	B cell proliferation	6.07273e-05	0.00333893
GO:1903322	positive regulation of protein modification by small protein conjugation or removal	6.23641e-05	0.00339912
GO:0034605	cellular response to heat	6.62663e-05	0.00358067
GO:0002718	regulation of cytokine production involved in immune response	6.81485e-05	0.0036509
GO:0006979	response to oxidative stress	7.03659e-05	0.00373774
GO:0002822	regulation of adaptive immune response based on somatic recombination of immune receptors built from immunoglobulin superfamily domains	7.21495e-05	0.00380028
GO:0002262	myeloid cell homeostasis	7.30848e-05	0.00381746
GO:0016570	histone modification	7.60193e-05	0.00393793
GO:1901800	positive regulation of proteasomal protein catabolic process	7.7963e-05	0.00400551
GO:0002824	positive regulation of adaptive immune response based on somatic recombination of immune receptors built from immunoglobulin superfamily domains	7.86898e-05	0.00400998
GO:0071559	response to transforming growth factor beta	8.0412e-05	0.0040647
GO:0007033	vacuole organization	8.3959e-05	0.00421004
GO:0016050	vesicle organization	9.22617e-05	0.00458965
GO:1905666	regulation of protein localization to endosome	9.54204e-05	0.00470941
GO:0045936	negative regulation of phosphate metabolic process	9.87768e-05	0.00478111
GO:0046635	positive regulation of alpha-beta T cell activation	9.91615e-05	0.00478111
GO:0070527	platelet aggregation	9.91615e-05	0.00478111
GO:0031668	cellular response to extracellular stimulus	0.000102046	0.00488263
GO:0031398	positive regulation of protein ubiquitination	0.000108143	0.00513517
GO:0010563	negative regulation of phosphorus metabolic process	0.000109915	0.00518005
GO:2000516	positive regulation of CD4-positive, alpha-beta T cell activation	0.000113536	0.00530253
GO:0042060	wound healing	0.000114206	0.00530253
GO:0044773	mitotic DNA damage checkpoint signaling	0.000119383	0.00550217
GO:0032984	protein-containing complex disassembly	0.000121472	0.00555758
GO:0050818	regulation of coagulation	0.000122514	0.00556464
GO:0042129	regulation of T cell proliferation	0.00012454	0.00558538
GO:0070098	chemokine-mediated signaling pathway	0.000124753	0.00558538
GO:0002456	T cell mediated immunity	0.000125956	0.00559923
GO:0009314	response to radiation	0.000131942	0.00582402
GO:0034660	ncRNA metabolic process	0.000135594	0.00594338
GO:0002709	regulation of T cell mediated immunity	0.000139861	0.00604585
GO:0044774	mitotic DNA integrity checkpoint signaling	0.000139861	0.00604585
GO:0000045	autophagosome assembly	0.000144218	0.00619149
GO:0045580	regulation of T cell differentiation	0.000149615	0.00637949
GO:0006692	prostanoid metabolic process	0.000155067	0.00650929
GO:0006693	prostaglandin metabolic process	0.000155067	0.00650929
GO:2001233	regulation of apoptotic signaling pathway	0.000155774	0.00650929
GO:0002260	lymphocyte homeostasis	0.000162259	0.00664731
GO:0032623	interleukin-2 production	0.000162259	0.00664731
GO:0032663	regulation of interleukin-2 production	0.000162259	0.00664731
GO:0030595	leukocyte chemotaxis	0.000167483	0.00680803
GO:0045786	negative regulation of cell cycle	0.000169381	0.00680803
GO:0000075	cell cycle checkpoint signaling	0.000169441	0.00680803
GO:0001832	blastocyst growth	0.000171177	0.00683401
GO:0032743	positive regulation of interleukin-2 production	0.000173188	0.00685142
GO:0002244	hematopoietic progenitor cell differentiation	0.0001738	0.00685142
GO:0007265	Ras protein signal transduction	0.00017702	0.0068917
GO:0032386	regulation of intracellular transport	0.00017702	0.0068917
GO:0071560	cellular response to transforming growth factor beta stimulus	0.000181098	0.00700694
GO:0097191	extrinsic apoptotic signaling pathway	0.000183121	0.00704174
GO:0002274	myeloid leukocyte activation	0.000186892	0.00714293
GO:0002711	positive regulation of T cell mediated immunity	0.00019196	0.00729215
GO:0042113	B cell activation	0.000199645	0.00749757
GO:1903039	positive regulation of leukocyte cell-cell adhesion	0.000200119	0.00749757
GO:0030193	regulation of blood coagulation	0.000200956	0.00749757
GO:1990868	response to chemokine	0.000207073	0.00754378
GO:1990869	cellular response to chemokine	0.000207073	0.00754378
GO:0043620	regulation of DNA-templated transcription in response to stress	0.000207187	0.00754378
GO:0034470	ncRNA processing	0.000208116	0.00754378
GO:1903052	positive regulation of proteolysis involved in cellular protein catabolic process	0.000208212	0.00754378
GO:0045619	regulation of lymphocyte differentiation	0.000209531	0.00754794
GO:1901653	cellular response to peptide	0.000219929	0.00787724
GO:0043618	regulation of transcription from RNA polymerase II promoter in response to stress	0.000236517	0.00842322
GO:0009267	cellular response to starvation	0.000240708	0.00852406
GO:0062208	positive regulation of pattern recognition receptor signaling pathway	0.000249474	0.00873382
GO:0001833	inner cell mass cell proliferation	0.000251835	0.00873382
GO:0022409	positive regulation of cell-cell adhesion	0.000252131	0.00873382
GO:0007179	transforming growth factor beta receptor signaling pathway	0.000252272	0.00873382
GO:0007250	activation of NF-kappaB-inducing kinase activity	0.000257779	0.00873382
GO:0034134	toll-like receptor 2 signaling pathway	0.000257779	0.00873382
GO:0036499	PERK-mediated unfolded protein response	0.000257779	0.00873382
GO:0048535	lymph node development	0.000257779	0.00873382
GO:0032733	positive regulation of interleukin-10 production	0.000260252	0.00877022
GO:0031123	RNA 3'-end processing	0.000266598	0.00893602
GO:0022411	cellular component disassembly	0.000283071	0.00943771
GO:0019058	viral life cycle	0.000287297	0.00952793
GO:0045860	positive regulation of protein kinase activity	0.000294047	0.00970046
GO:0006636	unsaturated fatty acid biosynthetic process	0.000313641	0.01023
GO:0007059	chromosome segregation	0.000314733	0.01023
GO:0001933	negative regulation of protein phosphorylation	0.000316315	0.01023
GO:0018209	peptidyl-serine modification	0.000317788	0.01023
GO:0031669	cellular response to nutrient levels	0.000318658	0.01023
GO:0018394	peptidyl-lysine acetylation	0.000322479	0.01023
GO:0060326	cell chemotaxis	0.000324557	0.01023
GO:0034504	protein localization to nucleus	0.000324787	0.01023
GO:0044403	biological process involved in symbiotic interaction	0.000324787	0.01023
GO:0002702	positive regulation of production of molecular mediator of immune response	0.000327914	0.0102768
GO:0051099	positive regulation of binding	0.000333445	0.0103925
GO:0032465	regulation of cytokinesis	0.000336137	0.0103925
GO:0032092	positive regulation of protein binding	0.000338273	0.0103925
GO:0009615	response to virus	0.000340496	0.0103925
GO:0018393	internal peptidyl-lysine acetylation	0.000341603	0.0103925
GO:0051098	regulation of binding	0.00034298	0.0103925
GO:1901533	negative regulation of hematopoietic progenitor cell differentiation	0.000343213	0.0103925
GO:0009408	response to heat	0.000345727	0.0104183
GO:0002294	CD4-positive, alpha-beta T cell differentiation involved in immune response	0.00035837	0.0106965
GO:1900046	regulation of hemostasis	0.00035837	0.0106965
GO:1905037	autophagosome organization	0.000361243	0.0107312
GO:0002726	positive regulation of T cell cytokine production	0.000370394	0.0108997
GO:0002755	MyD88-dependent toll-like receptor signaling pathway	0.000370394	0.0108997
GO:0006261	DNA-dependent DNA replication	0.000374142	0.0109585
GO:0002830	positive regulation of type 2 immune response	0.000385989	0.0112008
GO:0070431	nucleotide-binding oligomerization domain containing 2 signaling pathway	0.000385989	0.0112008
GO:0043331	response to dsRNA	0.000399313	0.0115341
GO:0033135	regulation of peptidyl-serine phosphorylation	0.000408594	0.011748
GO:0042092	type 2 immune response	0.000413238	0.0118273
GO:0032755	positive regulation of interleukin-6 production	0.000423872	0.0120513
GO:0043123	positive regulation of I-kappaB kinase/NF-kappaB signaling	0.000424909	0.0120513
GO:0010212	response to ionizing radiation	0.000427121	0.0120594
GO:0033157	regulation of intracellular protein transport	0.000440211	0.0123733
GO:0050671	positive regulation of lymphocyte proliferation	0.00044473	0.0123981
GO:0016573	histone acetylation	0.000445049	0.0123981
GO:0046634	regulation of alpha-beta T cell activation	0.000448353	0.0124349
GO:0034612	response to tumor necrosis factor	0.000460442	0.0126742
GO:0032388	positive regulation of intracellular transport	0.000461027	0.0126742
GO:0016241	regulation of macroautophagy	0.000466533	0.0127696
GO:0002287	alpha-beta T cell activation involved in immune response	0.000471822	0.0128025
GO:0002293	alpha-beta T cell differentiation involved in immune response	0.000471822	0.0128025
GO:0006475	internal protein amino acid acetylation	0.000478979	0.0128851
GO:0090316	positive regulation of intracellular protein transport	0.000478979	0.0128851
GO:0140053	mitochondrial gene expression	0.000485634	0.0130083
GO:0000302	response to reactive oxygen species	0.000494472	0.0131657
GO:0035728	response to hepatocyte growth factor	0.00049571	0.0131657
GO:0042093	T-helper cell differentiation	0.000528066	0.0139659
GO:0032946	positive regulation of mononuclear cell proliferation	0.000532765	0.014031
GO:0062207	regulation of pattern recognition receptor signaling pathway	0.000553617	0.0145191
GO:0002697	regulation of immune effector process	0.000557545	0.0145612
GO:0002467	germinal center formation	0.000572961	0.0147564
GO:0045624	positive regulation of T-helper cell differentiation	0.000574437	0.0147564
GO:0140467	integrated stress response signaling	0.000574437	0.0147564
GO:1901522	positive regulation of transcription from RNA polymerase II promoter involved in cellular response to chemical stimulus	0.000574437	0.0147564
GO:0010543	regulation of platelet activation	0.000585248	0.0149674
GO:0051222	positive regulation of protein transport	0.000587424	0.0149674
GO:0030218	erythrocyte differentiation	0.000594279	0.0150807
GO:0071902	positive regulation of protein serine/threonine kinase activity	0.000606269	0.015323
GO:0002369	T cell cytokine production	0.000615489	0.0154315
GO:0002724	regulation of T cell cytokine production	0.000615489	0.0154315
GO:0032753	positive regulation of interleukin-4 production	0.000623365	0.0155667
GO:0050870	positive regulation of T cell activation	0.000637507	0.0158567
GO:0046638	positive regulation of alpha-beta T cell differentiation	0.00065732	0.0162849
GO:0031023	microtubule organizing center organization	0.000662465	0.0163478
GO:0090174	organelle membrane fusion	0.000728263	0.017901
GO:1901988	negative regulation of cell cycle phase transition	0.000760602	0.0186229
GO:0050878	regulation of body fluid levels	0.000774346	0.0187842
GO:0002286	T cell activation involved in immune response	0.000775201	0.0187842
GO:0030593	neutrophil chemotaxis	0.00077618	0.0187842
GO:0007093	mitotic cell cycle checkpoint signaling	0.000794153	0.019046
GO:0034101	erythrocyte homeostasis	0.000794153	0.019046
GO:0006919	activation of cysteine-type endopeptidase activity involved in apoptotic process	0.000796116	0.019046
GO:0043484	regulation of RNA splicing	0.000813019	0.0193764
GO:0006413	translational initiation	0.000820813	0.0194808
GO:0046486	glycerolipid metabolic process	0.000823615	0.0194808
GO:1903557	positive regulation of tumor necrosis factor superfamily cytokine production	0.000831596	0.0195223
GO:2000060	positive regulation of ubiquitin-dependent protein catabolic process	0.000831596	0.0195223
GO:0051095	regulation of helicase activity	0.000838797	0.0195449
GO:0070493	thrombin-activated receptor signaling pathway	0.000838797	0.0195449
GO:0002703	regulation of leukocyte mediated immunity	0.000846091	0.0196418
GO:0022613	ribonucleoprotein complex biogenesis	0.000851056	0.0196842
GO:0045807	positive regulation of endocytosis	0.000885834	0.0202939
GO:0008625	extrinsic apoptotic signaling pathway via death domain receptors	0.000887129	0.0202939
GO:1905897	regulation of response to endoplasmic reticulum stress	0.000887129	0.0202939
GO:0048284	organelle fusion	0.000897072	0.0204032
GO:0046637	regulation of alpha-beta T cell differentiation	0.000898418	0.0204032
GO:0002292	T cell differentiation involved in immune response	0.000902081	0.0204124
GO:0043434	response to peptide hormone	0.000931568	0.0210038
GO:1905898	positive regulation of response to endoplasmic reticulum stress	0.00094765	0.0212293
GO:0007098	centrosome cycle	0.000948342	0.0212293
GO:0009411	response to UV	0.00095794	0.0213678
GO:0002699	positive regulation of immune effector process	0.000969475	0.0215485
GO:0043372	positive regulation of CD4-positive, alpha-beta T cell differentiation	0.000987215	0.0217544
GO:0098727	maintenance of cell number	0.000987425	0.0217544
GO:0032527	protein exit from endoplasmic reticulum	0.000989152	0.0217544
GO:0009895	negative regulation of catabolic process	0.00100192	0.0219581
GO:0033138	positive regulation of peptidyl-serine phosphorylation	0.00101189	0.0220993
GO:0050727	regulation of inflammatory response	0.00102577	0.0223248
GO:0050852	T cell receptor signaling pathway	0.0010372	0.0224954
GO:0032436	positive regulation of proteasomal ubiquitin-dependent protein catabolic process	0.0010668	0.0230576
GO:0006469	negative regulation of protein kinase activity	0.00107489	0.0231525
GO:0090150	establishment of protein localization to membrane	0.00109434	0.0234908
GO:0033002	muscle cell proliferation	0.00109976	0.0235266
GO:0019827	stem cell population maintenance	0.00112832	0.0240554
GO:0045785	positive regulation of cell adhesion	0.00113645	0.0241466
GO:0042159	lipoprotein catabolic process	0.00116462	0.0246616
GO:0002084	protein depalmitoylation	0.00119952	0.0251458
GO:0035747	natural killer cell chemotaxis	0.00119952	0.0251458
GO:0048280	vesicle fusion with Golgi apparatus	0.00119952	0.0251458
GO:0051607	defense response to virus	0.00122612	0.0255325
GO:0140546	defense response to symbiont	0.00122612	0.0255325
GO:0038061	NIK/NF-kappaB signaling	0.00124865	0.0258301
GO:0070555	response to interleukin-1	0.00124865	0.0258301
GO:0071347	cellular response to interleukin-1	0.00129204	0.0265842
GO:0018205	peptidyl-lysine modification	0.00129358	0.0265842
GO:0072678	T cell migration	0.00130796	0.0267918
GO:1902749	regulation of cell cycle G2/M phase transition	0.00132183	0.0269877
GO:0043330	response to exogenous dsRNA	0.00134403	0.027352
GO:1903828	negative regulation of cellular protein localization	0.00135571	0.0275002
GO:0042326	negative regulation of phosphorylation	0.00138287	0.0279608
GO:0071786	endoplasmic reticulum tubular network organization	0.00138878	0.02799
GO:0006906	vesicle fusion	0.00140132	0.0280892
GO:0030099	myeloid cell differentiation	0.00140267	0.0280892
GO:1990823	response to leukemia inhibitory factor	0.00141614	0.0282686
GO:0007254	JNK cascade	0.00142967	0.0284482
GO:0046456	icosanoid biosynthetic process	0.0014385	0.0285333
GO:0002335	mature B cell differentiation	0.00146037	0.028538
GO:0032633	interleukin-4 production	0.00146037	0.028538
GO:0032673	regulation of interleukin-4 production	0.00146037	0.028538
GO:0034110	regulation of homotypic cell-cell adhesion	0.00146037	0.028538
GO:0106106	cold-induced thermogenesis	0.00146605	0.028538
GO:0120161	regulation of cold-induced thermogenesis	0.00146605	0.028538
GO:0032233	positive regulation of actin filament bundle assembly	0.00147826	0.0286866
GO:0006984	ER-nucleus signaling pathway	0.001487	0.0287671
GO:0044839	cell cycle G2/M phase transition	0.0015036	0.0289987
GO:0008630	intrinsic apoptotic signaling pathway in response to DNA damage	0.00151123	0.0290564
GO:0046641	positive regulation of alpha-beta T cell proliferation	0.0015188	0.0291126
GO:0043280	positive regulation of cysteine-type endopeptidase activity involved in apoptotic process	0.00152871	0.0292133
GO:0045927	positive regulation of growth	0.00155712	0.0296658
GO:0051701	biological process involved in interaction with host	0.00156768	0.0296997
GO:0036003	positive regulation of transcription from RNA polymerase II promoter in response to stress	0.00157312	0.0296997
GO:0050820	positive regulation of coagulation	0.00157312	0.0296997
GO:0051817	modulation of process of other organism involved in symbiotic interaction	0.0015822	0.0297815
GO:0032760	positive regulation of tumor necrosis factor production	0.00160268	0.0300766
GO:2001242	regulation of intrinsic apoptotic signaling pathway	0.00162838	0.0304678
GO:0006458	'de novo' protein folding	0.0016381	0.0305377
GO:0030968	endoplasmic reticulum unfolded protein response	0.00164186	0.0305377
GO:0034599	cellular response to oxidative stress	0.00165997	0.0307821
GO:0042306	regulation of protein import into nucleus	0.00166918	0.0307821
GO:0006513	protein monoubiquitination	0.00167465	0.0307821
GO:2000514	regulation of CD4-positive, alpha-beta T cell activation	0.00167465	0.0307821
GO:0043393	regulation of protein binding	0.0017688	0.0323957
GO:0034135	regulation of toll-like receptor 2 signaling pathway	0.00177794	0.0323957
GO:0070424	regulation of nucleotide-binding oligomerization domain containing signaling pathway	0.00177794	0.0323957
GO:0070266	necroptotic process	0.001795	0.0326118
GO:0019083	viral transcription	0.00180184	0.0326415
GO:0030888	regulation of B cell proliferation	0.00189923	0.0343066
GO:0051302	regulation of cell division	0.00194977	0.0351183
GO:0050729	positive regulation of inflammatory response	0.00195846	0.0351737
GO:0042594	response to starvation	0.00201537	0.0360511
GO:0006473	protein acetylation	0.00202234	0.0360511
GO:0071356	cellular response to tumor necrosis factor	0.00202457	0.0360511
GO:0070665	positive regulation of leukocyte proliferation	0.00204243	0.0361411
GO:0032103	positive regulation of response to external stimulus	0.0020509	0.0361411
GO:0002831	regulation of response to biotic stimulus	0.00205199	0.0361411
GO:0071375	cellular response to peptide hormone stimulus	0.00205268	0.0361411
GO:0016049	cell growth	0.00208062	0.0365303
GO:0019076	viral release from host cell	0.00210936	0.0365519
GO:0030851	granulocyte differentiation	0.00210936	0.0365519
GO:0035890	exit from host	0.00210936	0.0365519
GO:0035891	exit from host cell	0.00210936	0.0365519
GO:0031349	positive regulation of defense response	0.002111	0.0365519
GO:0031667	response to nutrient levels	0.00215948	0.0370704
GO:0034138	toll-like receptor 3 signaling pathway	0.00216571	0.0370704
GO:0080009	mRNA methylation	0.00216571	0.0370704
GO:0030307	positive regulation of cell growth	0.00217052	0.0370704
GO:0051236	establishment of RNA localization	0.00217052	0.0370704
GO:0031330	negative regulation of cellular catabolic process	0.00218069	0.0371429
GO:0008286	insulin receptor signaling pathway	0.0022048	0.0374517
GO:0001659	temperature homeostasis	0.00221632	0.0375456
GO:0070997	neuron death	0.00222319	0.0375605
GO:0009266	response to temperature stimulus	0.00223504	0.037653
GO:0006446	regulation of translational initiation	0.00224177	0.037653
GO:0002828	regulation of type 2 immune response	0.00225269	0.037653
GO:2000144	positive regulation of DNA-templated transcription, initiation	0.00225269	0.037653
GO:0034109	homotypic cell-cell adhesion	0.00226149	0.0376533
GO:0071478	cellular response to radiation	0.00226473	0.0376533
GO:0009416	response to light stimulus	0.00232218	0.0385064
GO:0034123	positive regulation of toll-like receptor signaling pathway	0.00237186	0.0389308
GO:0009301	snRNA transcription	0.00238109	0.0389308
GO:0030220	platelet formation	0.00238109	0.0389308
GO:0036344	platelet morphogenesis	0.00238109	0.0389308
GO:2000369	regulation of clathrin-dependent endocytosis	0.00238109	0.0389308
GO:0043370	regulation of CD4-positive, alpha-beta T cell differentiation	0.00238504	0.0389308
GO:0010389	regulation of G2/M transition of mitotic cell cycle	0.00240117	0.0389834
GO:1990830	cellular response to leukemia inhibitory factor	0.00240117	0.0389834
GO:0010970	transport along microtubule	0.00240692	0.0389834
GO:0044380	protein localization to cytoskeleton	0.00243815	0.0393222
GO:0051788	response to misfolded protein	0.00244981	0.0393222
GO:0090330	regulation of platelet aggregation	0.00244981	0.0393222
GO:0051220	cytoplasmic sequestering of protein	0.00246316	0.0393222
GO:0050657	nucleic acid transport	0.00246993	0.0393222
GO:0050658	RNA transport	0.00246993	0.0393222
GO:0044786	cell cycle DNA replication	0.00247175	0.0393222
GO:0048193	Golgi vesicle transport	0.00249683	0.0396206
GO:0046890	regulation of lipid biosynthetic process	0.00251927	0.0397998
GO:0043543	protein acylation	0.00252082	0.0397998
GO:0052126	movement in host environment	0.00253916	0.0399328
GO:0045930	negative regulation of mitotic cell cycle	0.0025488	0.0399328
GO:0043624	cellular protein complex disassembly	0.00255228	0.0399328
GO:0006399	tRNA metabolic process	0.00255604	0.0399328
GO:0032543	mitochondrial translation	0.0025611	0.0399328
GO:0030705	cytoskeleton-dependent intracellular transport	0.00259626	0.0403225
GO:0030100	regulation of endocytosis	0.00259896	0.0403225
GO:0042177	negative regulation of protein catabolic process	0.00269759	0.0416036
GO:0045628	regulation of T-helper 2 cell differentiation	0.00269806	0.0416036
GO:2001056	positive regulation of cysteine-type endopeptidase activity	0.00270145	0.0416036
GO:1901186	positive regulation of ERBB signaling pathway	0.00272277	0.0418292
GO:0032615	interleukin-12 production	0.00274994	0.0420405
GO:0032655	regulation of interleukin-12 production	0.00274994	0.0420405
GO:0042116	macrophage activation	0.00277677	0.0422447
GO:0046822	regulation of nucleocytoplasmic transport	0.00277677	0.0422447
GO:0001558	regulation of cell growth	0.00283575	0.0429833
GO:0002700	regulation of production of molecular mediator of immune response	0.00283903	0.0429833
GO:0002706	regulation of lymphocyte mediated immunity	0.0028636	0.0432506
GO:0032479	regulation of type I interferon production	0.0029015	0.043613
GO:0032606	type I interferon production	0.0029015	0.043613
GO:0006970	response to osmotic stress	0.00296255	0.044424
GO:0000086	G2/M transition of mitotic cell cycle	0.00297485	0.0445021
GO:0008631	intrinsic apoptotic signaling pathway in response to oxidative stress	0.00299829	0.0447459
GO:0031647	regulation of protein stability	0.00305199	0.0454392
GO:0010948	negative regulation of cell cycle process	0.0030902	0.045899
GO:0071806	protein transmembrane transport	0.00312588	0.0463192
GO:1904951	positive regulation of establishment of protein localization	0.00314638	0.0465131
GO:1990266	neutrophil migration	0.00317317	0.0467987
GO:1990845	adaptive thermogenesis	0.00319857	0.0470626
GO:1901532	regulation of hematopoietic progenitor cell differentiation	0.00323696	0.0475158
GO:2001235	positive regulation of apoptotic signaling pathway	0.00325411	0.047656
GO:0036503	ERAD pathway	0.00330497	0.0481656
GO:0043405	regulation of MAP kinase activity	0.00330914	0.0481656
GO:0043281	regulation of cysteine-type endopeptidase activity involved in apoptotic process	0.00331196	0.0481656
GO:0051452	intracellular pH reduction	0.00334827	0.0485809
GO:0003376	sphingosine-1-phosphate receptor signaling pathway	0.00338457	0.0485906
GO:0007171	activation of transmembrane receptor protein tyrosine kinase activity	0.00338457	0.0485906
GO:0031468	nuclear membrane reassembly	0.00338457	0.0485906
GO:0098734	macromolecule depalmitoylation	0.00338457	0.0485906
GO:0002705	positive regulation of leukocyte mediated immunity	0.00339545	0.0485906
GO:0032147	activation of protein kinase activity	0.00339545	0.0485906
GO:0006839	mitochondrial transport	0.00344858	0.0492384
GO:0062098	regulation of programmed necrotic cell death	0.00347863	0.0494781
GO:1904589	regulation of protein import	0.00348115	0.0494781
GO:0002204	somatic recombination of immunoglobulin genes involved in immune response	0.0035216	0.0494919
GO:0002208	somatic diversification of immunoglobulins involved in immune response	0.0035216	0.0494919
GO:0030195	negative regulation of blood coagulation	0.0035216	0.0494919
GO:0045190	isotype switching	0.0035216	0.0494919
GO:0046605	regulation of centrosome cycle	0.0035216	0.0494919
GO:0042542	response to hydrogen peroxide	0.0035596	0.049914
