# Supplementary material for: Identification of immune characteristic landscapes related to autophagy in ischemic stroke
Source: Front Cell Dev Biol. 2022 Nov 29;10:1026578. doi: 10.3389/fcell.2022.1026578 (PMC9745074; doi:10.3389/fcell.2022.1026578)
Supplement: Supplementary file 9 [file Table1.XLSX]

## Sheet: Sheet1
Information of GEO datasets
ID	tissue	Platform	IS sample	Control sample
GSE22255	Blood	GPL570	20	20
GSE58294	Blood	GPL570	69	23
GSE16561	Blood	GPL6883	39	24
